# Supplementary material
Source: publisher figshare collection journal article supplement (https://sage.figshare.com/ndownloader/files/13585919)
Supplement: Supplementary file 1 [file 13585919]

| Variable Name                                     | Source of Data                  | Description                                                                                                                  | Included in Propensity Score Model | Variable Name in Database | Values and Database Codes                                                                                                                                                           |
|---------------------------------------------------|---------------------------------|------------------------------------------------------------------------------------------------------------------------------|------------------------------------|---------------------------|-------------------------------------------------------------------------------------------------------------------------------------------------------------------------------------|
| <b>Main Comparison Groups</b>                     |                                 |                                                                                                                              |                                    |                           |                                                                                                                                                                                     |
| FEMAP-User                                        | Primary data from FEMAP program | User of FEMAP services, defined based on linked database from program which included data on program clients.                | Yes (dependent variable)           | N/A                       | All people in the cohort who are also represented in the FEMAP data are classified as a FEMAP-user (1), and all remaining cohort members are classified as a non-user (0)           |
| <b>Baseline Socio-Demographic Characteristics</b> |                                 |                                                                                                                              |                                    |                           |                                                                                                                                                                                     |
| Age at Index Date                                 | RPDB                            | Age at index date                                                                                                            | Yes                                | BDATE                     | Continuous variable calculated based on index date and birth date                                                                                                                   |
| Gender                                            | RPDB                            | Recorded sex                                                                                                                 | Yes                                | SEX                       | 1 = Male<br>2 = Female                                                                                                                                                              |
| Rural Residence                                   | RPDB                            | Rural place of residence, defined using the Rurality Index of Ontario. Areas with score of 40 or above are considered rural. | Yes                                | RIO2008                   | 1 = Rural<br>0 = Non-Rural                                                                                                                                                          |
| Resides Outside of Catchment Area                 | RPDB                            | Whether the patient resides outside of the EPI catchment area, based on list of postal codes for EPI program catchment area  | Hard Matched                       | PSTLCODE                  | 1 = Yes<br>2 = No                                                                                                                                                                   |
| Residential Instability                           | ONMARG                          | Neighbourhood-level indicator of residential instability constructed based on census data                                    | Yes                                | INSTABILITY_Q_CSD         | 1 = Least Marginalized<br>5 = Most Marginalized                                                                                                                                     |
| Deprivation                                       | ONMARG                          | Neighbourhood-level indicator of material deprivation constructed based on census data                                       | Yes                                | DEPRIVATION_Q_CSD         | 1 = Least Marginalized<br>5 = Most Marginalized                                                                                                                                     |
| Ethnic Concentration                              | ONMARG                          | Neighbourhood-level indicator of ethnic concentration constructed based on census data                                       | Yes                                | ETHNICCON_Q_CSD           | 1 = Least Marginalized<br>5 = Most Marginalized                                                                                                                                     |
| Dependency                                        | ONMARG                          | Neighbourhood-level indicator of social dependency constructed based on census data                                          | Yes                                | DEPENDENCY_Q_CSD          | 1 = Least Marginalized<br>5 = Most Marginalized                                                                                                                                     |
| Income Quintile                                   | RPDB                            | Neighbourhood-level income quintile                                                                                          | Yes                                | INCQUINT                  | 1 = Lowest Income Quintile<br>5 = Highest Income Quintile                                                                                                                           |
| Migrant Status                                    | IRCC                            | Migrant status for first-generation immigrants and refugees (since 1985)                                                     | Yes                                | CATEG                     | 0 = Non-Migrants (Not Included in IRCC Database)<br>1 = Immigrant (All Codes not Listed Below)<br>2 = Refugee (020-029,031-034,037,047-049,052-055,080,086-089,094-095,120-142,153) |

| Variable Name                               | Source of Data          | Description                                                                                                                                        | Included in Propensity Score Model | Variable Name in Database                                                                                                           | Values and Database Codes                                                                                                                                                                                  |
|---------------------------------------------|-------------------------|----------------------------------------------------------------------------------------------------------------------------------------------------|------------------------------------|-------------------------------------------------------------------------------------------------------------------------------------|------------------------------------------------------------------------------------------------------------------------------------------------------------------------------------------------------------|
| <b>Baseline Service-Use Characteristics</b> |                         |                                                                                                                                                    |                                    |                                                                                                                                     |                                                                                                                                                                                                            |
| Index Diagnosis                             | DAD, OMHRS, OHIP, NACRS | Diagnostic category of index diagnosis                                                                                                             | Yes                                | DXCODE, DX10CODE (DAD)<br>AXIS1_DSM4CODE_DISCH1 (OMHRS)<br>DXCODE (OHIP)<br>DX10CODE1 (NACRS)                                       | 1 = Mood Disorder (DSM-IV = 296.X, 300.4, 301.13; ICD-10 = F3; OHIP = 296, 311)<br>2 = Anxiety Disorder (DSM-IV = 300.X, 308.X, 309.X; ICD-10 = F4; OHIP = 300, 309)                                       |
| Year                                        | DAD, OMHRS, OHIP, NACRS | Year of index diagnosis                                                                                                                            | Hard Matched                       | DDATE (DAD, OMHRS)<br>SERVDATE (OHIP)<br>REGDATE (NACRS)                                                                            | N/A                                                                                                                                                                                                        |
| Age at First Mood or Anxiety Diagnosis      | RPDB                    | Age at first ever diagnosis of a mood or anxiety disorder, either outside of the case ascertainment window or prior to meeting our case definition | Yes                                | BDATE                                                                                                                               | Continuous variable calculated based on date of first ever mood or anxiety disorder and birth date                                                                                                         |
| Age at First Mental Health Diagnosis        | RPDB                    | Age at first ever diagnosis of a mental disorder                                                                                                   | Yes                                | BDATE                                                                                                                               | Continuous variable calculated based on date of first ever diagnosis of mental disorder (DSM-IV = 291.X, 292.X, 295.X-319.X; ICD-10 = F codes; Any OMHRS contact; OHIP = 291, 292, 295-319) and birth date |
| Discordant Diagnosis                        | OHIP, NACRS             | If diagnosis based on physician or emergency department visits, whether the diagnostic category was discordant across the diagnoses                | No                                 | See description of Index Diagnosis                                                                                                  | 1 = Discordant Diagnoses<br>0 = Concordant Diagnoses                                                                                                                                                       |
| Source of Index Diagnosis                   | DAD, OMHRS, OHIP, NACRS | Source of the index diagnosis of mood or anxiety disorder                                                                                          | Hard Matched                       | DXCODE, DX10CODE (DAD)<br>AXIS1_DSM4CODE_DISCH1 (OMHRS)<br>DXCODE (OHIP)<br>DX10CODE1 (NACRS)<br>SPEC (OHIP)<br>PRVSERV1-10 (NACRS) | 1 = Inpatient<br>2 = Psychiatrist or FEMAP<br>3 = Other Physician or ED                                                                                                                                    |
| Prior Alcohol Related Disorder              | DAD, OMHRS, OHIP, NACRS | Whether person had contact with services for alcohol-related disorders prior to the index date.                                                    | Yes                                | DXCODE, DX10CODE (DAD)<br>AXIS1_DSM4CODE_DISCH1 (OMHRS)<br>DXCODE (OHIP)<br>DX10CODE1 (NACRS)                                       | 1 = Prior contact with services for alcohol-related disorders (ICD-10 = F10; ICD-9 = 291.X, 303.X, 305.0)<br>0 = No prior contact with services for alcohol-related disorders                              |

| Variable Name                                        | Source of Data          | Description                                                                                                                                                                            | Included in Propensity Score Model | Variable Name in Database                                                                     | Values and Database Codes                                                                                                                                                                                        |
|------------------------------------------------------|-------------------------|----------------------------------------------------------------------------------------------------------------------------------------------------------------------------------------|------------------------------------|-----------------------------------------------------------------------------------------------|------------------------------------------------------------------------------------------------------------------------------------------------------------------------------------------------------------------|
| Prior Substance Related Disorder                     | DAD, OMHRS, OHIP, NACRS | Whether person had contact with services for substance-related disorders prior to the index date.                                                                                      | Yes                                | DXCODE, DX10CODE (DAD)<br>AXIS1_DSM4CODE_DISCH1 (OMHRS)<br>DXCODE (OHIP)<br>DX10CODE1 (NACRS) | 1 = Prior contact with services for substance-related disorders (ICD-10 = F11-F19, F55; ICD-9 = 292.X, 304.X, 305.2-305.9)<br>0 = No prior contact with services for alcohol-related disorders                   |
| Patient Covered by Ontario Drug Benefit Program      | ODB                     | Whether the person was covered by the Ontario Drug Benefit program, which pays for prescription medications for people on social assistance or disability support programs.            | Yes                                | IKN                                                                                           | 1 = Covered by ODB<br>0 = Not covered by ODB                                                                                                                                                                     |
| Family Physician Contact in Previous 6 Months        | OHIP                    | Any primary care visit for a mental health reason in the previous 6 months, defined as all mental health service codes and general service codes with a mental health diagnostic code. | Yes                                | Algorithm Description:<br>Med Care:42(10),960-965                                             | 1 = Contact with Family Physician<br>0 = No Contact with Family Physician                                                                                                                                        |
| Psychiatrist Contact in Previous 6 Months            | OHIP                    | Any outpatient psychiatry visit in the previous 6 months                                                                                                                               | Yes                                | SPEC                                                                                          | 1 = Contact with Psychiatrist (00064, 00065)<br>0 = No Contact with Psychiatrist                                                                                                                                 |
| Emergency Department Visit in Previous 6 Months      | NACRS                   | Any emergency department visit for a mental health reason in the previous 6 months                                                                                                     | Yes                                | DX10CODE1                                                                                     | 1 = Emergency Department Visit (ICD-10 = All F codes; ICD-9 = 291.x,292.x,and 295.x-319.x; Transfers excluded)<br>0 = No Emergency Department Visit                                                              |
| Psychiatric Hospitalization in Previous 6 Months     | DAD, OMHRS              | Any hospitalization in the previous 6 months with a primary discharge diagnosis of a mental disorder                                                                                   | Yes                                | DXCODE, DX10CODE (DAD)<br>AXIS1_DSM4CODE_DISCH1 (OMHRS)                                       | 1 = Psychiatric Hospitalization (ICD-10 = All F Codes; ICD-9 = 291.x, 292.x, and 294.x-319.x; OMHRS = All hospitalizations EXCEPT 293.X, 780.X, 290.X, 294.X, and V codes)<br>0 = No Psychiatric Hospitalization |
| Total Psychiatric Hospital Days in Previous 6 Months | DAD, OMHRS              | Total number of psychiatric hospital days in the previous 6 months                                                                                                                     | Yes                                | LOS                                                                                           | Continuous variable                                                                                                                                                                                              |

| Variable Name                | Source of Data   | Description                                                                                                                                                                       | Included in Propensity Score Model | Variable Name in Database                                                                                                         | Values and Database Codes                                                                                                                                                                                                                                                                                                                                                                                        |
|------------------------------|------------------|-----------------------------------------------------------------------------------------------------------------------------------------------------------------------------------|------------------------------------|-----------------------------------------------------------------------------------------------------------------------------------|------------------------------------------------------------------------------------------------------------------------------------------------------------------------------------------------------------------------------------------------------------------------------------------------------------------------------------------------------------------------------------------------------------------|
| <b>Outcome Variables</b>     |                  |                                                                                                                                                                                   |                                    |                                                                                                                                   |                                                                                                                                                                                                                                                                                                                                                                                                                  |
| Contact with Primary Care    | OHIP             | Any primary care visit for a mental health reason after EPI admission, defined as all mental health service codes and general service codes with a mental health diagnostic code. | No                                 | Algorithm Description:<br>Med Care:42(10),960-965                                                                                 | 1 = Contact with Family Physician<br>0 = No Contact with Family Physician                                                                                                                                                                                                                                                                                                                                        |
| Contact with Psychiatrist    | OHIP             | Any outpatient psychiatry visit after FEMAP admission                                                                                                                             | No                                 | SPEC                                                                                                                              | 1 = Contact with Psychiatrist (00064, 00065)<br>0 = No Contact with Psychiatrist                                                                                                                                                                                                                                                                                                                                 |
| Emergency Department Visits  | NACRS            | Any emergency department visit for a mental health reason after FEMAP admission                                                                                                   | No                                 | DX10CODE1                                                                                                                         | 1 = Emergency Department Visit (ICD-10 = All F codes; ICD-9 = 291.x,292.x,and 295.x-319.x; Transfers excluded)<br>0 = No Emergency Department Visit                                                                                                                                                                                                                                                              |
| Psychiatric Hospitalizations | DAD, OMHRS       | Any hospitalization after FEMAP admission with a primary discharge diagnosis of a mental disorder                                                                                 | No                                 | DXCODE, DX10CODE (DAD)<br>AXIS1_DSM4CODE_DISCH1 (OMHRS)                                                                           | 1 = Psychiatric Hospitalization (ICD-10 = All F Codes; ICD-9 = 291.x, 292.x, and 294.x-319.x; OMHRS = All hospitalizations EXCEPT 293.X, 780.X, 290.X, 294.X, and V codes)<br>0 = No Psychiatric Hospitalization                                                                                                                                                                                                 |
| Involuntary Admission        | DAD, OMHRS, OHIP | Any involuntary admission after FEMAP admission, including involuntary status in the emergency department and involuntary hospitalization                                         | No                                 | ADMMETH (DAD)<br>PT_STATUS (OMHRS)<br>FEEDCODE (OHIP)                                                                             | 1 = Involuntary Admission (ADMMETH = D, E; PT_STATUS = 1, 4; FEEDCODE = K623, K624)                                                                                                                                                                                                                                                                                                                              |
| Self-Harm Behaviour          | NACRS            | Any ED visit for self-harm after FEMAP admission                                                                                                                                  | No                                 | DX10CODE1                                                                                                                         | 1 = Self-Harm Behaviour (ICD9 = E950-E959; ICD 10 = X60-X84)<br>0 = No Self-Harm Behaviour                                                                                                                                                                                                                                                                                                                       |
| Suicide                      | ORGD             | Death by suicide after FEMAP admission                                                                                                                                            | No                                 | SUICIDE, DX9CODE, EALIVE, DX10CODE1-25, DISCHDISP (DAD)<br>DISCHREASON (OMHRS)<br>DX10CODE1-10, VISDISP2002 (NACRS)<br>COD (ORGD) | 1 = Suicide <ul style="list-style-type: none"> <li>• DAD: <ul style="list-style-type: none"> <li>i. SUICIDE = 1, or</li> <li>ii. DX9CODE = E950-E959 and EALIVE = X, or</li> <li>iii. DX10CODE1-25 = X60-84 and DISCHDISP = 07</li> </ul> </li> <li>• OMHRS: DISCHREASON (X90) = 2</li> <li>• NACRS: DX10CODE1-10 = X60-84 and VISDISP2002 = 10 or 11</li> <li>• ORGD: COD = E950-E959</li> </ul> 0 = No Suicide |
| All-Cause Mortality          | ORGD             | Death by any cause after FEMAP admission                                                                                                                                          | No                                 | DTHDATE                                                                                                                           | 1 = Death after EPI admission<br>0 = Alive                                                                                                                                                                                                                                                                                                                                                                       |
